# Supplementary material for: High-Throughput Screening for Salmonella Avirulent Mutants That Retain Targeting of Solid Tumors
Source: Oxford University Press journal article supplement (doi:10.1158/0008-5472.can-09-4005), 2010-03-14
Supplement: 00085472can094005-sup-appendix_2b.pdf [file 00085472can094005-sup-appendix_2b.pdf]

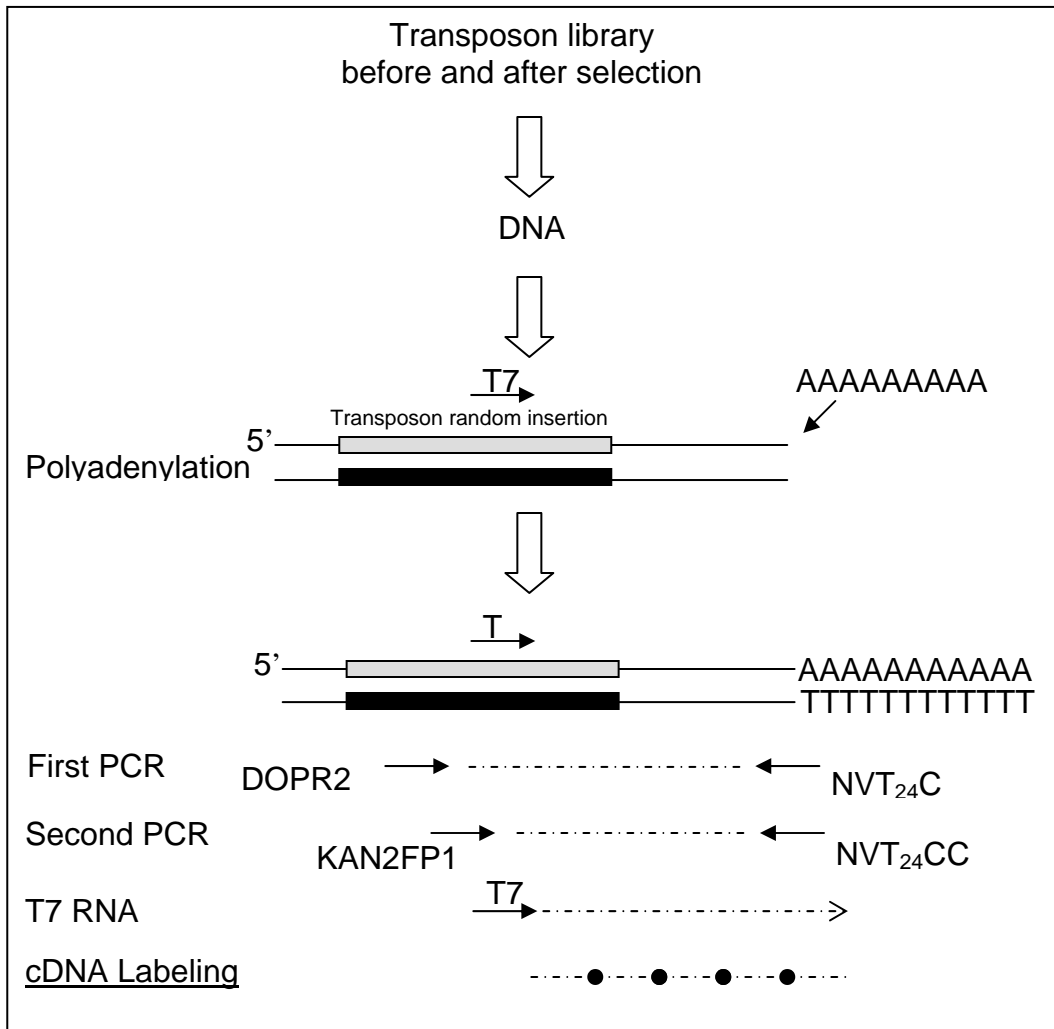

Appendix-2B: cDNA adjacent each mutant in the transposon mutant pool is prepared before and after selection. The cDNAs are then hybridized to a microarray to monitor changes in individual mutant fitness.
